# Supplementary material for: Real-time characterization of mammalian cell culture bioprocesses by magnetic sector MS
Source: Royal Society of Chemistry journal article supplement (doi:10.1039/d0ay01563f), 2020-01-01
Supplement: d0ay01563f1.pdf [file d0ay01563f1.pdf]

*Supplementary Information*

*Analytical Methods*

## **Real-time characterization of mammalian cell culture bioprocesses by magnetic sector MS**

Patrick Floris<sup>a</sup>, Noemí Dorival-García<sup>a</sup>, Graham Lewis<sup>b</sup>, Graham Josland<sup>b</sup>, Daniel Merriman<sup>b</sup>, Jonathan Bones<sup>\*a,c</sup>

<sup>a</sup>Characterisation and Comparability Laboratory, NIBRT-The National Institute for Bioprocessing Research and Training, Fosters avenue, Mount Merrion, Blackrock, Co. Dublin, A94 X099, Ireland.

<sup>b</sup>Thermo Fisher Scientific, Ion Path, Road Three, Winsford, CW7 3GA, United Kingdom.

<sup>c</sup>School of Chemical and Bioprocess Engineering, University College Dublin, Belfield, Dublin 4, D04 V1W8, Ireland.

\*Corresponding Author Email: jonathan.bones@nibrt.ie

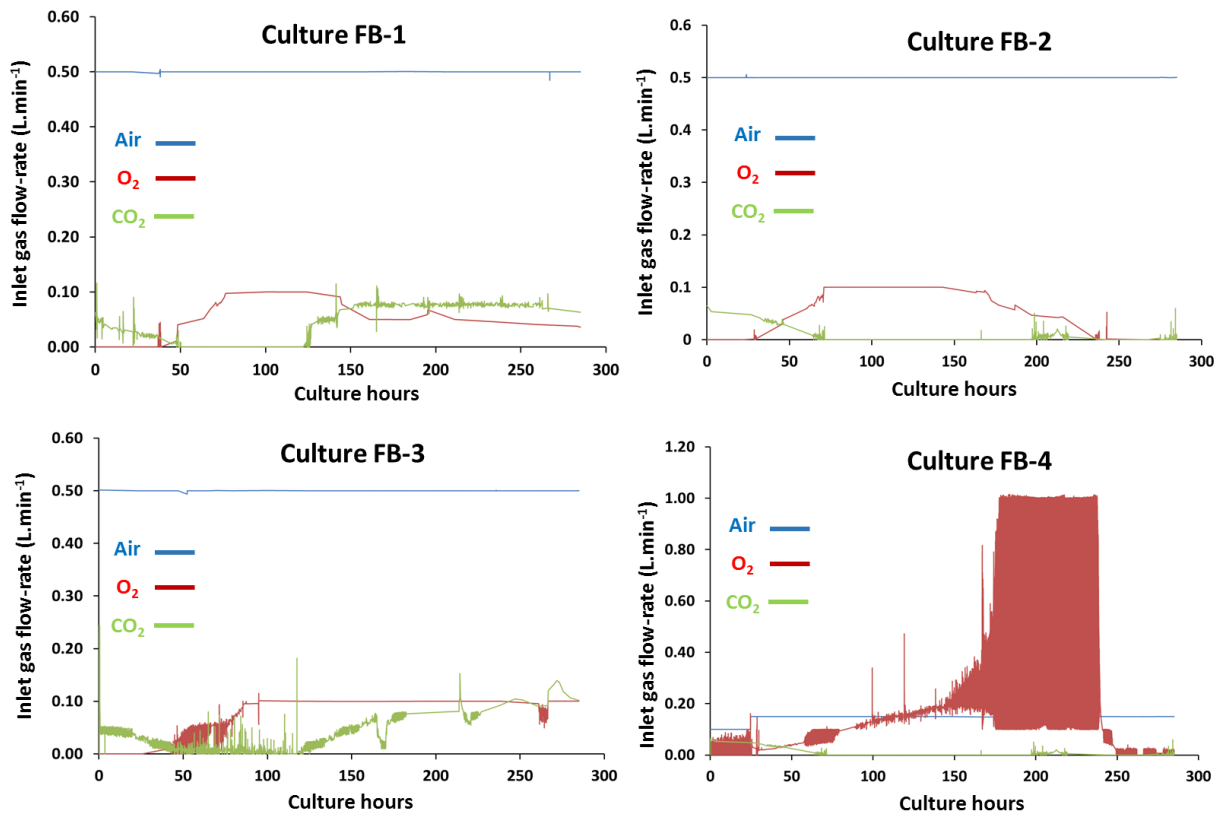

**Fig S1** Flow-rates for Air, O<sub>2</sub> and CO<sub>2</sub> delivered by the HyPerforma G3Lab controller to four fed-batch cultures which were monitored upon characterization of the exhaust-gas composition by magnetic sector MS analysis.

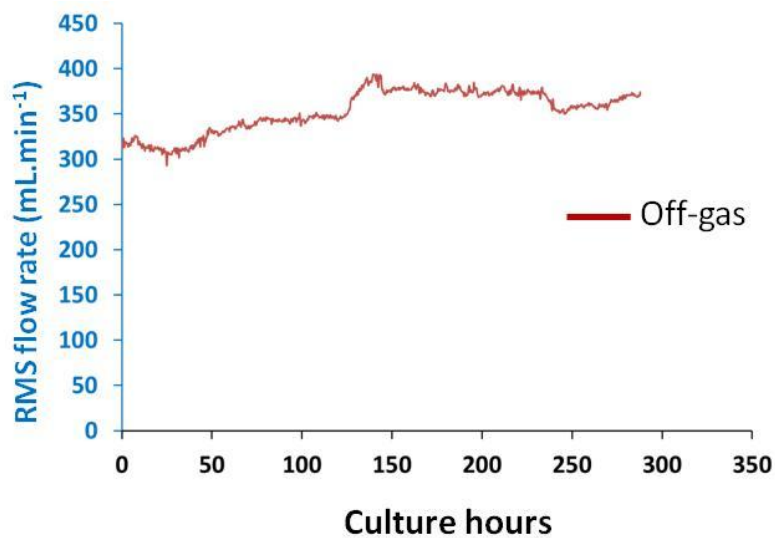

**Fig S2** Off-gas stream flow-rate in the fed-batch culture FB-2 which was monitored through the non-invasive V2 MS-bioreactor configuration. Inlet flow-rate values are not shown since in the V2 configuration the inlet gas composition was determined by analogue transfer of parameters from the G3Lab controller to the MS.

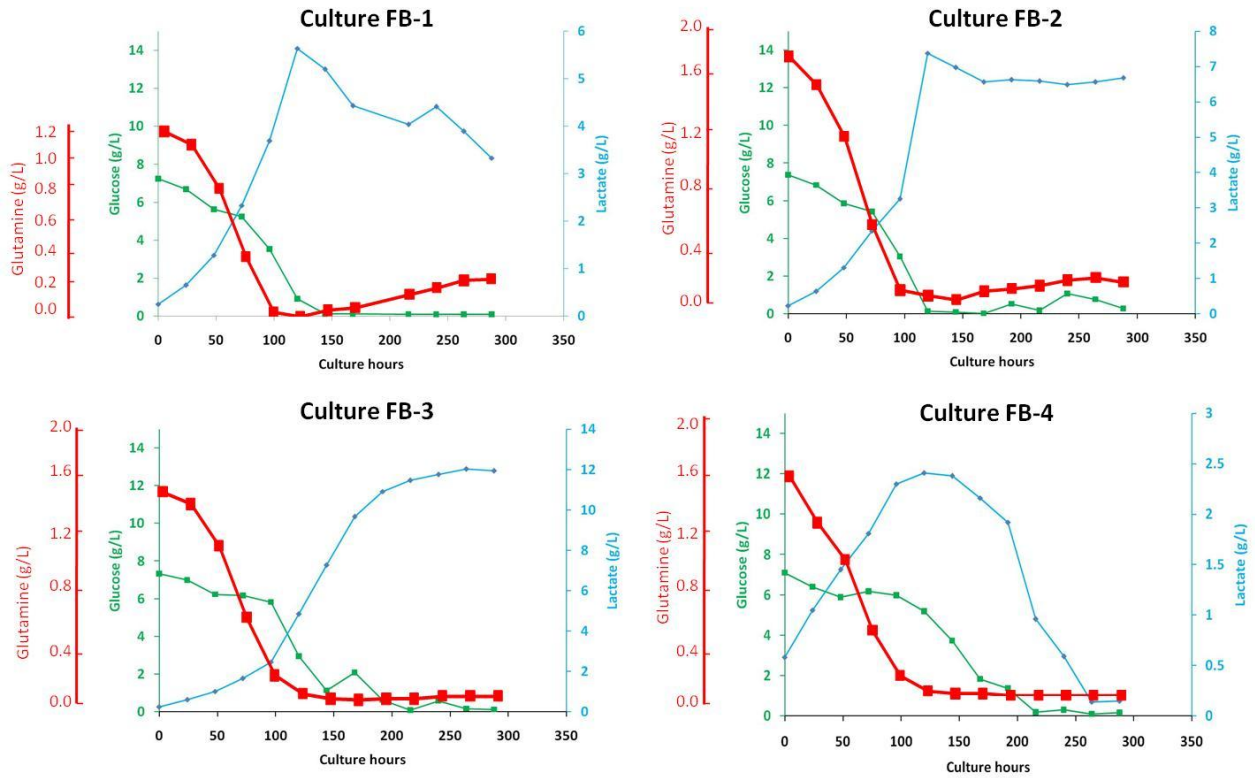

**Fig S3** Overview of glucose, lactate and glutamine profiles obtained in fed-batch cultures FB-1, FB-2, FB-3 and FB-4 respectively.

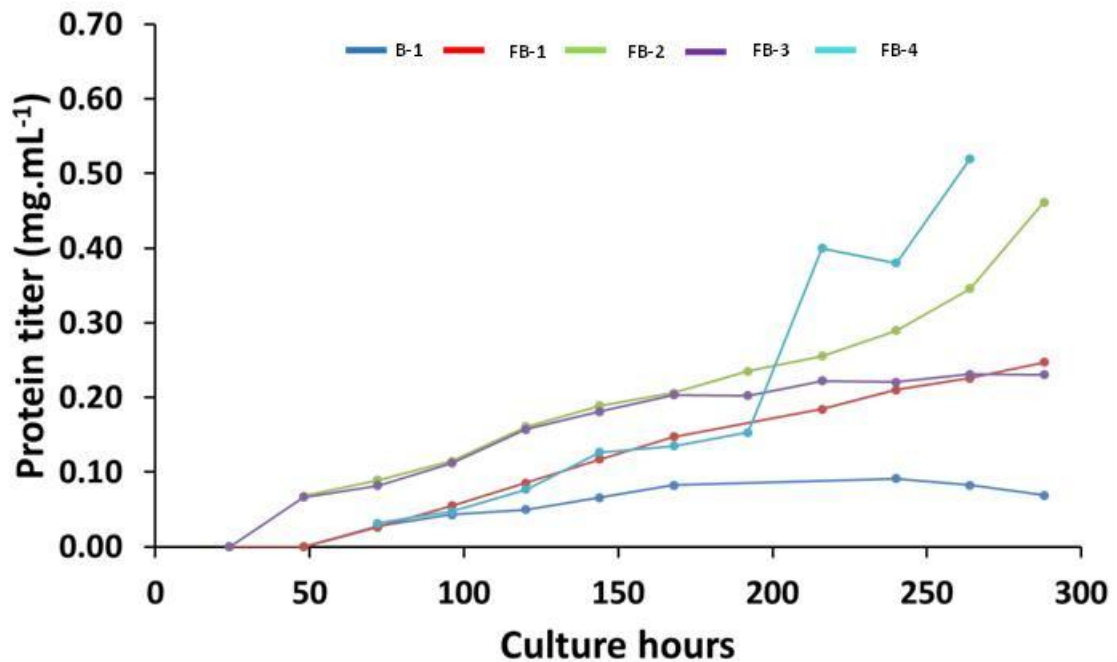

**Fig S4** Protein titer curves obtained by affinity liquid chromatography for batch (B-1) and fed-batch cultures (FB-x) evaluated upon characterization of the off-gas composition by magnetic sector MS.
